# Supplementary material for: Ostreopsis cf. ovata (Dinophyceae) Molecular Phylogeny, Morphology, and Detection of Ovatoxins in Strains and Field Samples from Brazil
Source: PubMed Central journal article supplement (PMC7076807; doi:10.3390/toxins12020070), 2020-01-22
Supplement: toxins-12-00070-s001.pdf [file toxins-12-00070-s001.pdf]

# Supplementary Materials: *Ostreopsis cf. ovata* (Dinophyceae) Molecular Phylogeny, Morphology, and Detection of Ovatoxins in Strains and Field Samples from Brazil

Silvia M. Nascimento, Raquel A. F. Neves, Gabriela De'Carli, Geovanna T. Borsato, Rodrigo A. F. da Silva, Guilherme A. Melo, Agatha M. de Moraes, Thais C. Cockell, Santiago Fraga, Adriana D. Menezes-Salgueiro, Luiz L. Mafra Jr, Philipp Hess and Fabiano Salgueiro

**Table S1.** Summary of samples analysed in the current study, indicating the nature of each sample, site of origin, date of collection and the analysis performed in each one.

| Sample                               | Place of origin                                                 | Date                | Molecular analysis | Thecal plates observation | Morphometrics | Toxins |
|--------------------------------------|-----------------------------------------------------------------|---------------------|--------------------|---------------------------|---------------|--------|
| strain UNR-03                        | Tartaruga, Armação dos Búzios RJ<br>(22°45'18" S, 41°54'07" W)  | October 2012        | x                  | x                         |               | x      |
| strain UNR-05                        | Forno, Armação dos Búzios, RJ<br>(22°45'42" S, 41°52'34" W)     | February 2013       | x                  | x                         |               | x      |
| strain UNR-10                        | Rio Grande do Norte<br>(6°13'34" S 35°02'58" W)                 | September 2013      | x                  | x                         |               |        |
| strain UNR-60                        | Fernando de Noronha<br>(3°52'33" S 32°28'04" W)                 | October 2016        | x                  | x                         |               |        |
| <i>O. cf. ovata</i><br>single cell 1 | Forte, Bahia<br>(12°34'41" S, 38°00'04" W)                      | January 2013        | x                  | x                         |               |        |
| <i>O. cf. ovata</i><br>single cell 2 | Forte, Bahia (12°34'41" S, 38°00'04" W)                         | January 2013        | x                  | x                         |               |        |
| <i>O. cf. ovata</i><br>single cell 3 | Forte, Bahia (12°34'41.0" S, 38°00'04.7" W)                     | January 2013        | x                  | x                         |               |        |
| Bloom 1                              | Forno, Arraial do Cabo, RJ<br>(22° 59' S, 42° 00' W)            | May 2012            |                    |                           |               | x      |
| Bloom 2                              | Tartaruga, Armação dos Búzios<br>(22°45'18" S, 41°54'07" W)     | December 2014       |                    |                           |               | x      |
| Field                                | Forno, Arraial do Cabo, RJ<br>(22° 59' S, 42° 00' W)            | December 2006       |                    |                           | x             |        |
| Field                                | Tartaruga, Armação dos Búzios, RJ<br>(22°45'18" S, 41°54'07" W) | February 2012       |                    |                           | x             |        |
| Field                                | Forno, Armação dos Búzios, RJ<br>(22°45'42" S, 41°52'34" W)     | December 2012       |                    |                           | x             |        |
| Field                                | Penha, Bahia<br>(12°59'27" S, 38°37'29" W)                      | July 2012           |                    |                           | x             |        |
| Field                                | Forte, Bahia<br>(12°34'41" S, 38°00'04" W)                      | January 2013        |                    |                           | x             |        |
| Field                                | Trindade Island<br>(20°29'22" S, 29°20'04" W)                   | September 2014      |                    |                           | x             |        |
| Field                                | Fernando de Noronha<br>(3°52'33" S 32°28'04" W)                 | October 2017 & 2018 |                    |                           | x             |        |
| Field                                | Saint Paul's Rocks<br>(0°55'10" N 29°20'33" W)                  | July 2009           |                    |                           | x             |        |

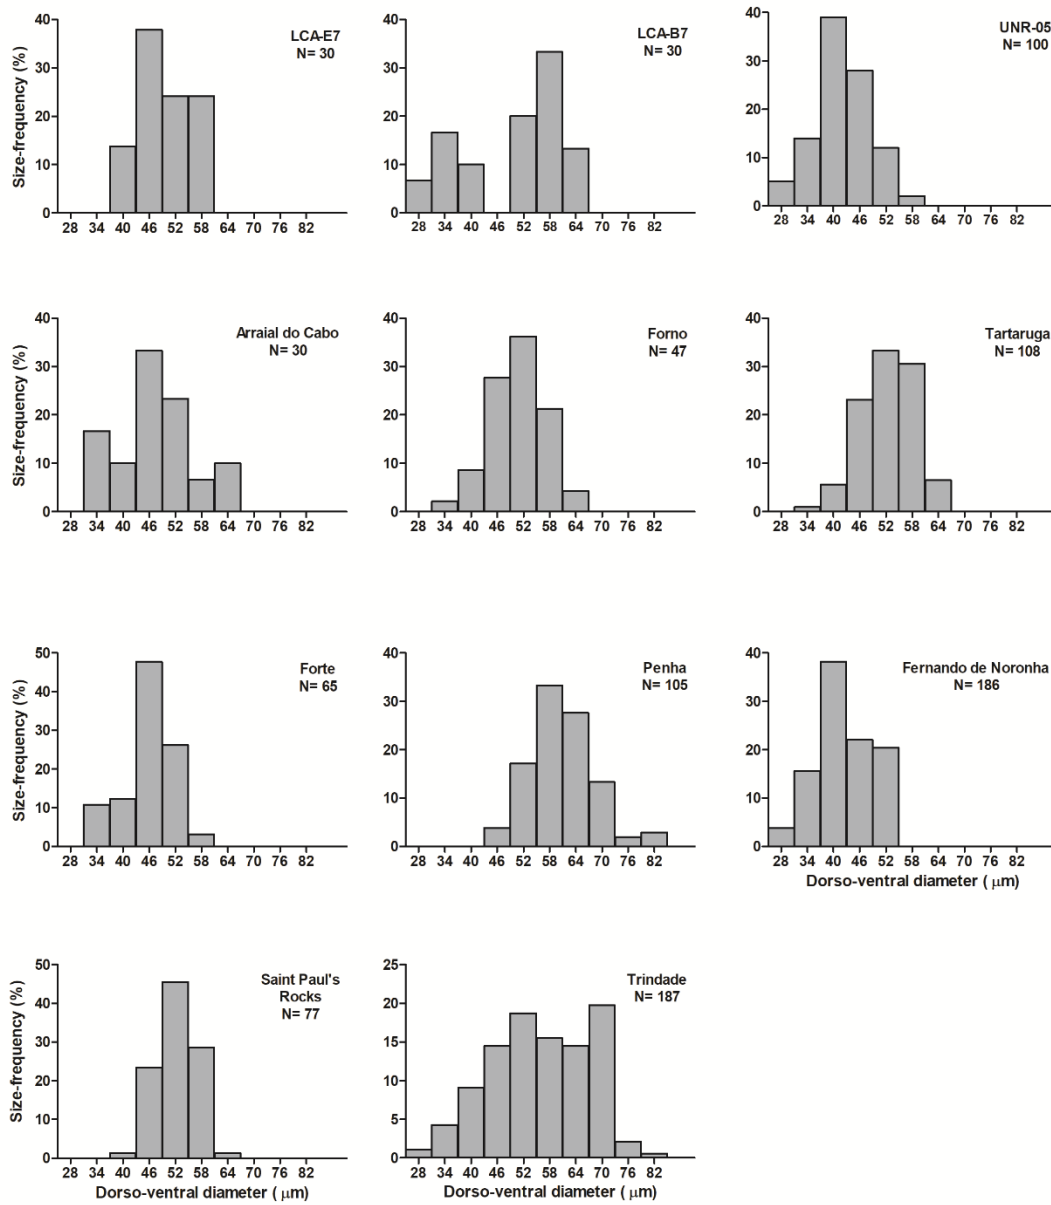

**Figure S1.** Size variability in dorso-ventral diameter (DV) of cultivated (LCA-E7, LCA-B7, UNR-05) and field cells of *O. cf. ovata* from coastal locations at Rio de Janeiro state (Arraiial do Cabo, Forno, Tartaruga) and Bahia (Forte, Penha) and from the oceanic islands of Fernando de Noronha, St. Paul's Rocks and Trindade, Brazil.
